# Supplementary material
Source: PubMed Central journal article supplement (PMC4074706)

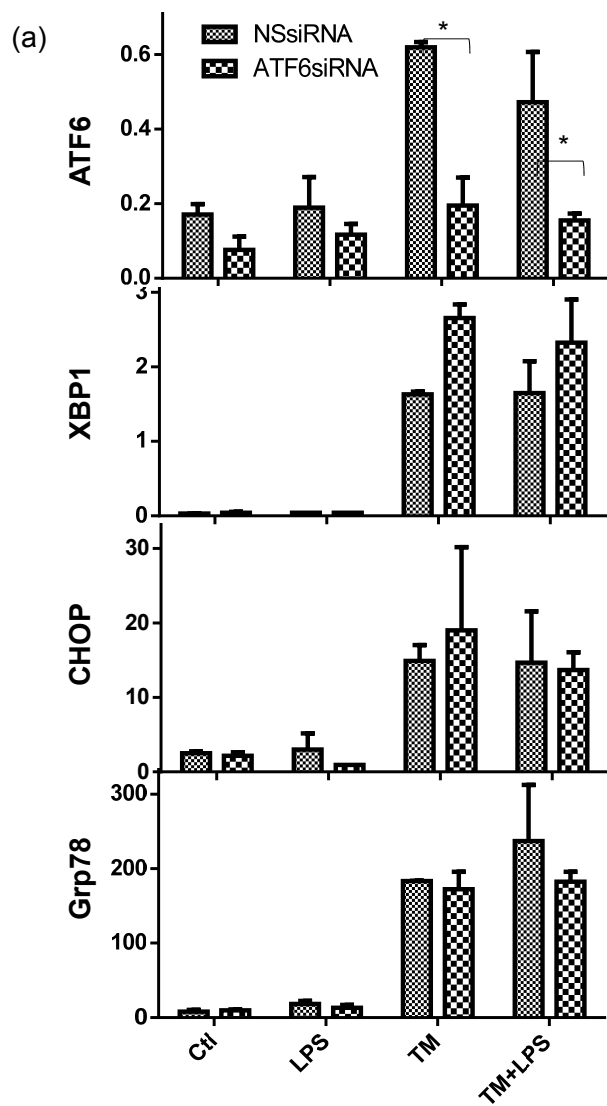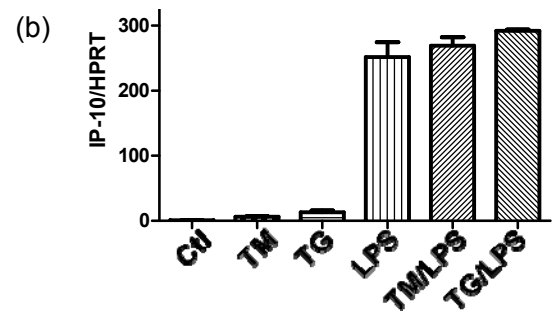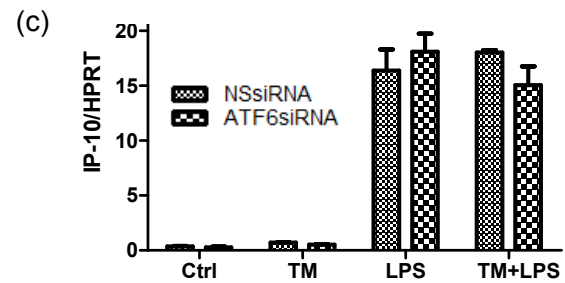

Supplement 2

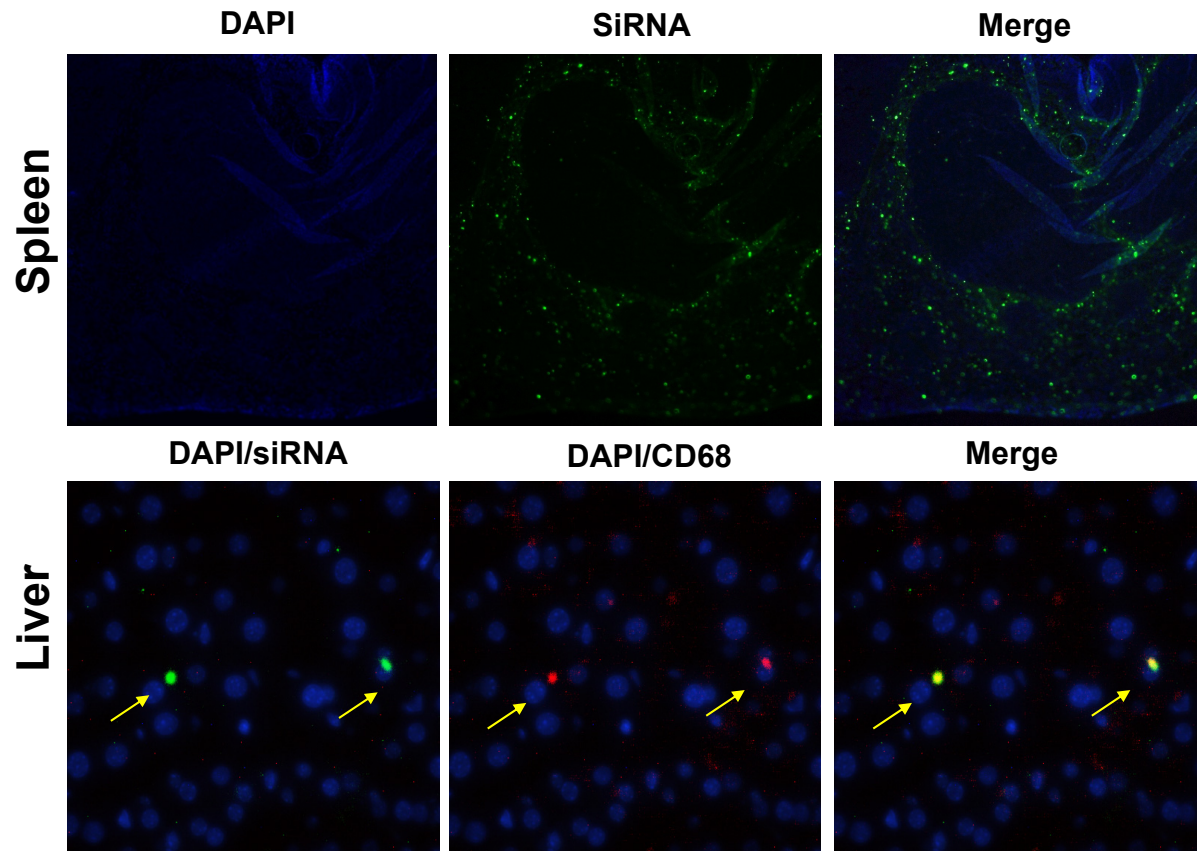

Supplement: NIHMS572320-supplement-Supp_FigS1-S2.pdf [file NIHMS572320-supplement-Supp_FigS1-S2.pdf]
